# Supplementary material for: NeVOmics: An Enrichment Tool for Gene Ontology and Functional Network Analysis and Visualization of Data from OMICs Technologies
Source: MDPI journal article supplement (doi:10.3390/genes9120569), 2018-11-23
Supplement: s1 [file s1]

## Supplementary Material

**Supplementary Figure S1:** NeVOmics can perform three different enrichment analysis using updated databases. The first analysis is Gene Ontology using all information stored in UniProt-GOA and UniProtKB. The second analysis uses all annotations stored in the KEGG database to find relevant pathways. The third analysis identify KEGG Pathways in not annotated organism from protein sequences.

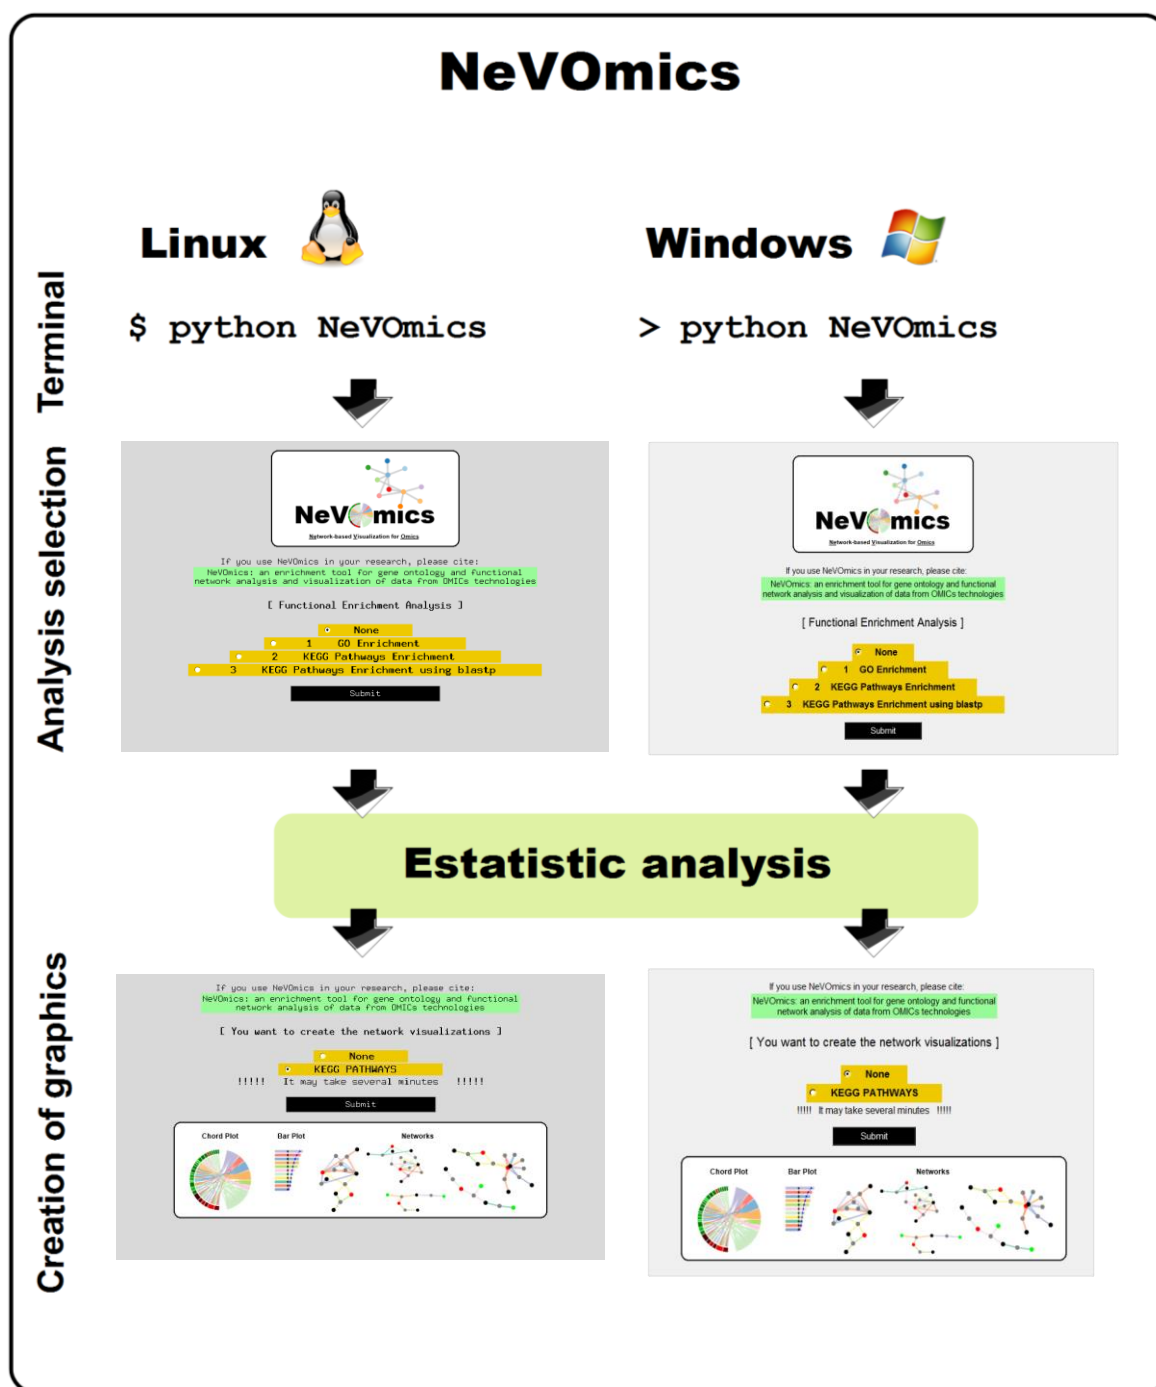

**Supplementary Figure S2:** Hypergeometric Distribution.

$$p - value = \frac{\binom{m}{x} \binom{N - m}{k - x}}{\binom{N}{k}}$$

| Variable | Description                                                                                                                             |
|----------|-----------------------------------------------------------------------------------------------------------------------------------------|
| <b>N</b> | The total number of genes/proteins with some annotation (background) in the Gene Ontology.                                              |
| <b>m</b> | The total number of genes/proteins from background annotated for some GO term/Pathway (e.g. Biological Process: signaling, GO:0023052). |
| <b>K</b> | Size of the selection. Number of genes/protein associated to at least one “Biological Process” in the Gene Ontology.                    |
| <b>x</b> | The number of genes/proteins inside the selection, associated with the process “signaling”.                                             |

**Supplementary Figure S3:** 137 unique GO terms detected with NeVOmics in the four conditions of Case study 2. These data are represented in a clustered heatmap that includes all up- or down-regulated identified gene products.

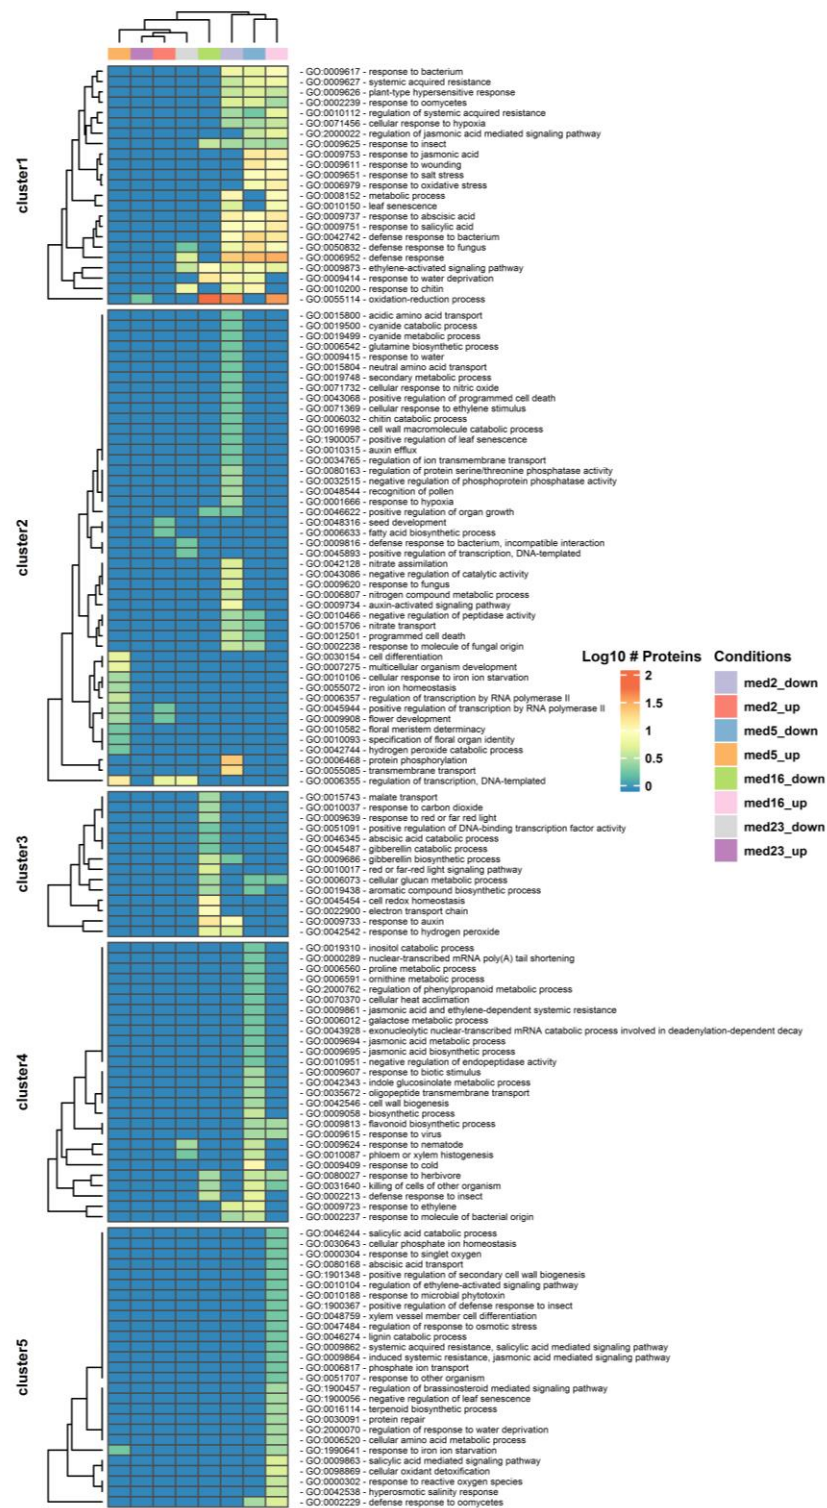

**Supplementary Table S1.** Data matrix in .csv format with 137 unique GO terms enriched by NeVOmics in Case study 2.

**Supplementary Table S2.** Data matrix .csv format with GO terms enriched by NeVOmics in Case study 2, with more than five proteins each.

**Supplementary Table S3.** Comparison of NeVOmics features with other functional enrichment tools.

| Enrichment tool    | Organism                 | GO Ontology | KEGG Pathways | Statistical method | Correction                | Graphical Visualization     | Time            | Ref |
|--------------------|--------------------------|-------------|---------------|--------------------|---------------------------|-----------------------------|-----------------|-----|
| <b>g:Profiler*</b> | 213 (species)            | A           | L             | H                  | FDR                       | Network                     | 1 min           | [1] |
| <b>GORILLA*</b>    | 8                        | A           | Na            | mHG                | FDR                       | DAG                         | 30 sec          | [2] |
| <b>DAVID*</b>      | Unknown                  | A           | A             | F                  | FDR<br>Bonferroni         | NA                          | 2 min           | [3] |
| <b>GOEAST*</b>     | 60 (species)             | A           | Na            | F, H, Chi-square   | FDR<br>Bonferroni         | DAG                         | 20 min          | [4] |
| <b>WebGIVI*</b>    | Unknown                  | A           | Na            | F                  | Unknown                   | Network and Graphics        | 3 min           | [5] |
| <b>WebGestalt*</b> | 12                       | A           | A             | H                  | FDR                       | DAG<br>Network              | 3 min           | [6] |
| <b>BiNGO</b>       | Unknown                  | A           | Na            | H                  | FDR<br>Bonferroni         | Network                     | Unknown         | [7] |
| <b>Funrich</b>     | Annotated species        | A           | Na            | Unknown            | Unknown                   | Network and Graphics        | Unknown         | [8] |
| <b>NeVOmics</b>    | <b>Annotated species</b> | <b>A</b>    | <b>A</b>      | <b>H</b>           | <b>FDR<br/>Bonferroni</b> | <b>Network and Graphics</b> | <b>Variable</b> |     |

A: Applicable

Na: Not Applicable

L: Limited, not applicable to all organisms

H: Hypergeometric distribution

F: Fisher's exact test

FDR: False Discovery Rate

DAG: Directed Acyclic Graph

mHG: minimum Hypergeometric

\* : Web tools

## References

1. Reimand J.; Arak, T.; Adler, P.; Kolberg, L.; Reisberg, S.; Peterson, H.; Vilo, J. g:Profiler-a web server for functional interpretation of gene lists (2016 update). *Nucleic Acids Res.* 2016, 44, W83-9. [[PubMed](#)] [[CrossRef](#)]
2. Eden, E.; Navon, R.; Steinfeld, I.; Lipson, D.; Yakhini, Z. GOrilla: a tool for discovery and visualization of enriched GO terms in ranked gene lists. *BMC Bioinformatics.* 2009, 10, 48. [[PubMed](#)] [[CrossRef](#)]
3. Huang D.W.; Sherman, B.T.; Tan Q.; Collins, J.R.; Alvord, W.G.; Roayaei, J.; Stephens, R.; Baseler, M.W.; Lane, H.C.; Lempicki, R.A. The DAVID Gene Functional Classification Tool: a novel biological module-centric algorithm to functionally analyze large gene lists. *Genome Biol.* 2007, 8, R183. [[PubMed](#)] [[CrossRef](#)]
4. Zheng, Q.; Wang, X.J. GOEAST: a web-based software toolkit for Gene Ontology enrichment analysis. *Nucleic Acids Res.* 2008, 36, W358-63. [[PubMed](#)] [[CrossRef](#)]

5. Sun, L.; Zhu, Y.; Mahmood, A.S.M.; Tudor, C.O.; Ren, J.; Vijay-Shanker, K.; Chen, J.; Schmidt, C.J. WebGVI: a web-based gene enrichment analysis and visualization tool. *BMC Bioinformatics*. 2017, 18, 237. [[PubMed](#)] [[CrossRef](#)]
6. Zhang, B.; Kirov, S.; Snoddy, J. WebGestalt: an integrated system for exploring gene sets in various biological contexts. *Nucleic Acids Res.* 2005, 33, W741-8. [[PubMed](#)] [[CrossRef](#)]
7. Maere, S.; Heymans, K.; Kuiper, M. BiNGO: a Cytoscape plugin to assess overrepresentation of Gene Ontology categories in Biological Networks. *Bioinforma. Appl.* 2005, 21, 3448–3449. [[PubMed](#)] [[CrossRef](#)]
8. Mohashin, P.; Shivakumar, K.; David, C.; Riccardo, A.; Ching-Seng, A.; Philip, A.; Arsen O.B.; Alberto, B.M.; Giovanni, C.; Aled, C.; Federica, C.; Dolores, D.V.; Juan, M.F.P.; Pedro, F.; Pamali, F.; Simona, F.; Yong, S.G.; An, H.; Esther, N-'t.H.; Nunzio, I.; Kenneth, K.; Thomas, K.; Joanna, K.; Igor, V.K.; Tommaso, L.; Yaxuan, L.; Alicia, LL.; Taral, R.L.; Sayantan, M.; Francesca, M.; Anders, Ø.; Theocharis, P.; Tushar, P.; Héctor, P.; Stefano Pluchino, Simona, P.; Goran, R.; Felix, R.; Susmita, S.; Cristiana, S.; Allan, S.; Clotilde, T.; Martijn, J.C. van H.; Marca, W.; Joanne, L.W.; Kening, Z.; Suresh, M.. A novel community driven software for functional enrichment analysis of extracellular vesicles data. *J. Extracell. Vesicles*. 2017, 6, 1321455. [[PubMed](#)] [[CrossRef](#)]

**Files in .tsv format with protein lists from *Homo sapiens* and *Arabidopsis thaliana* used in Case study 1 and 2, respectively, to test NeVOmics.**

**Supplementary File\_S1:** Early stage cancer list used in Case study 1

**Supplementary File\_S2:** med2 condition, Up/Down regulated genes used in Case study 2

**Supplementary File\_S3:** med2 condition, Down regulated genes used in Case study 2

**Supplementary File\_S4:** med2 condition, Up regulated genes used in Case study 2

**Supplementary File\_S5:** med5 condition, Up/Down regulated genes used in Case study 2

**Supplementary File\_S6:** med5 condition, Down regulated genes used in Case study 2

**Supplementary File\_S7:** med5 condition, Up regulated genes used in Case study 2

**Supplementary File\_S8:** med16 condition, Up/Down regulated genes used in Case study 2

**Supplementary File\_S9:** med16 condition, Down regulated genes used in Case study 2

**Supplementary File\_S10:** med16 condition, Up regulated genes used in Case study 2

**Supplementary File\_S11:** med23 condition, Up/Down regulated genes used in Case study 2

**Supplementary File\_S12:** med23 condition, Down regulated genes used in Case study 2

**Supplementary File\_S13:** med23 condition, Up regulated genes used in Case study 2
